# Supplementary material
Source: MDPI journal article supplement (https://www.mdpi.com/2076-3417/8/8/1245)
Supplement: s1 [file s1]

# Supplement Information: Systematic Investigation of Prelithiated SiO<sub>2</sub> Particles for High-Performance Lithium Battery Anodes

Yuyao Han, Xinyi Liu, Zhenda Lu

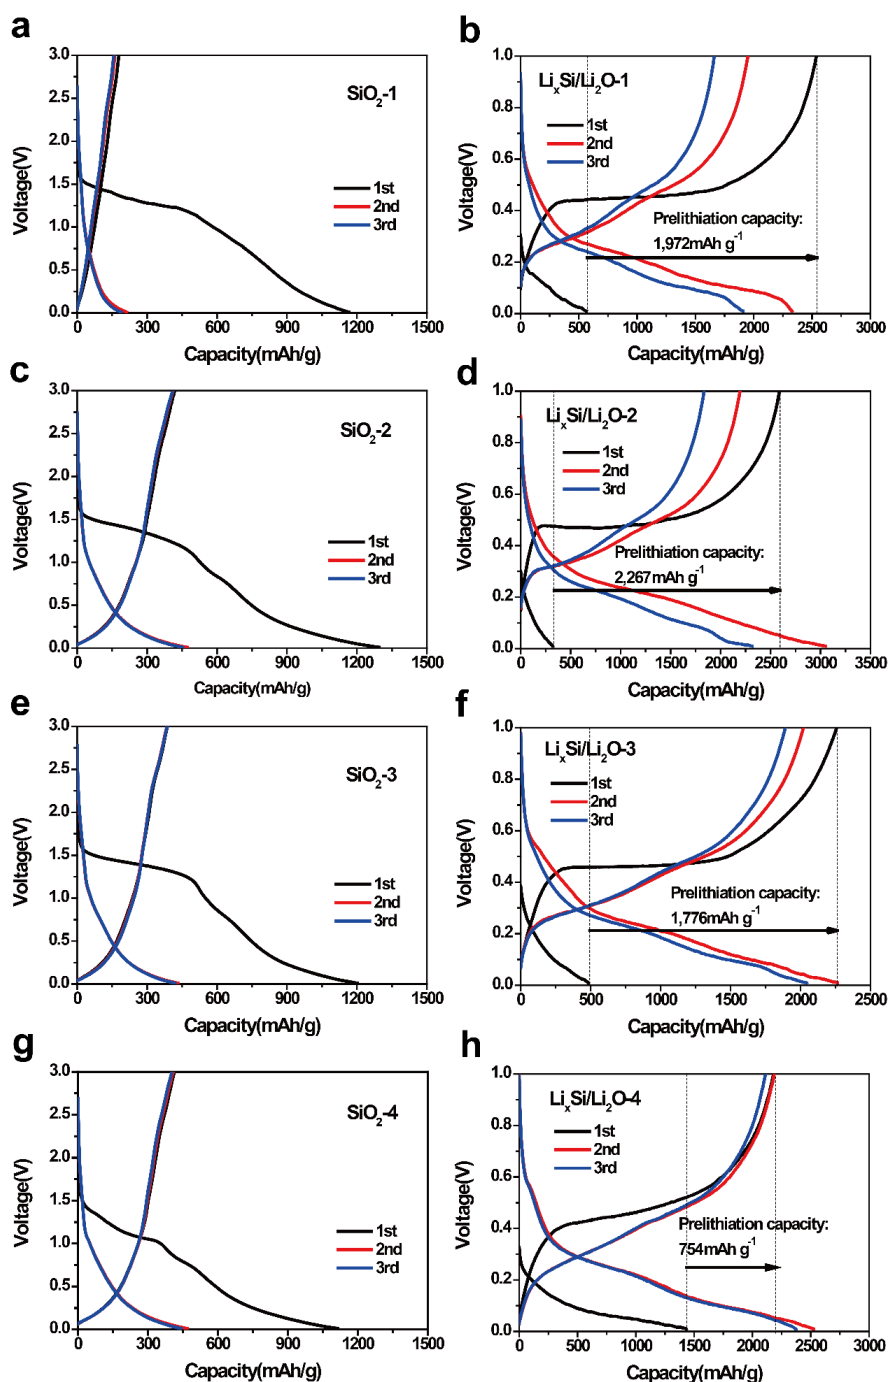

**Figure S1.** Galvanostatic charge/discharge profiles SiO<sub>2</sub> electrodes (2 nm, 10 nm, 300 nm, and 3  $\mu$ m) before (a, c, e, g) and after (b, d, f, h) lithiation.

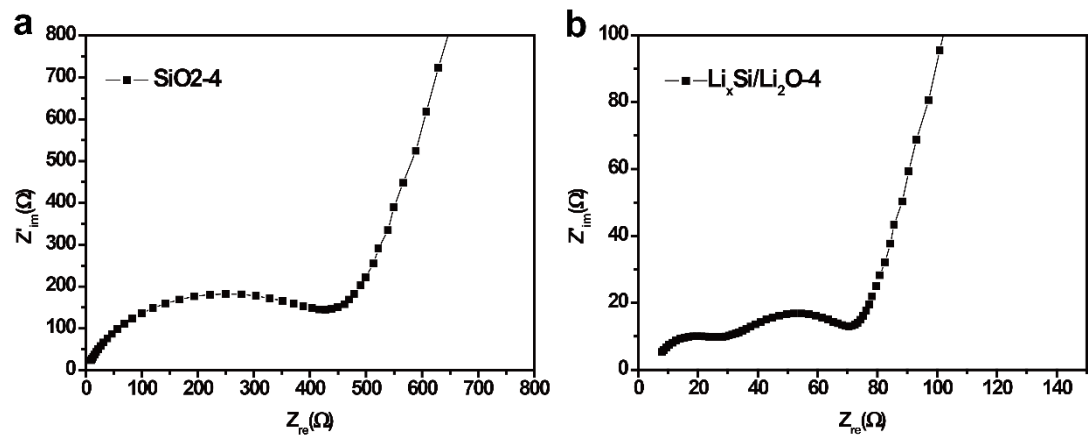

**Figure S2.** Electrochemical impedance spectroscopy of SiO<sub>2</sub>-4 electrodes before (a) and after (b) prelithiation at the first cycle.

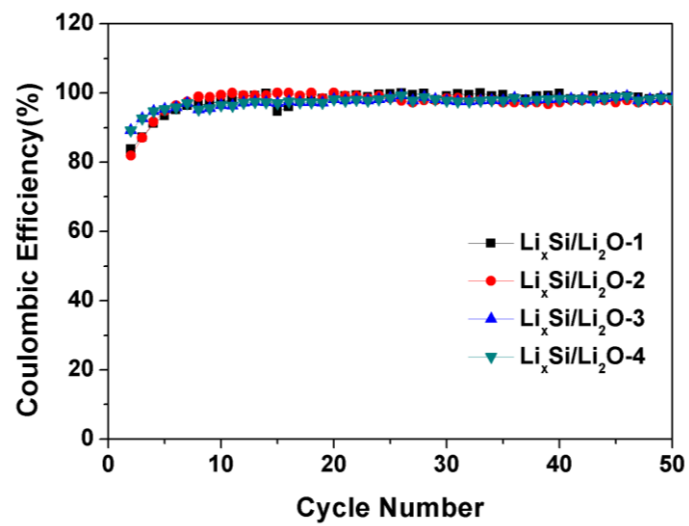

**Figure S3.** The Coulombic efficiency of four Li<sub>x</sub>Si/Li<sub>2</sub>O composites.

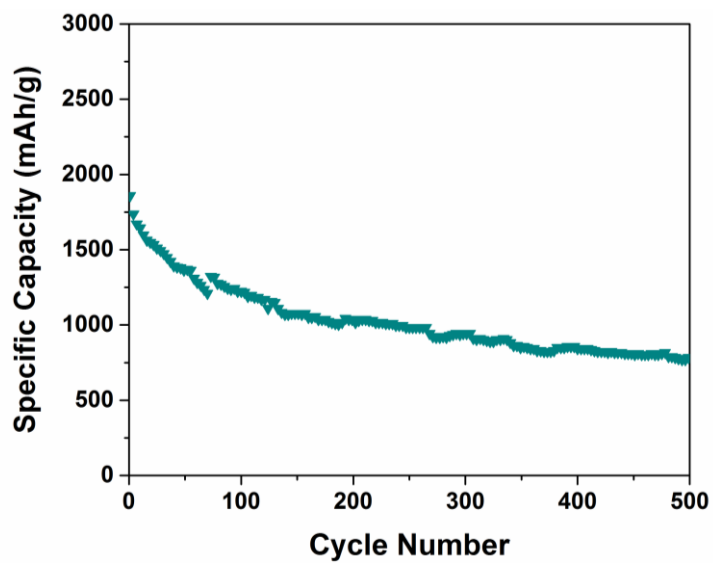

**Figure S4.** Cycling performance of Li<sub>x</sub>Si/Li<sub>2</sub>O-4 composite.
